# Supplementary material
Source: publisher figshare collection journal article supplement (https://acs.figshare.com/ndownloader/files/11357657)
Supplement: Supplementary file 1 [file 11357657]

## Supplementary figures

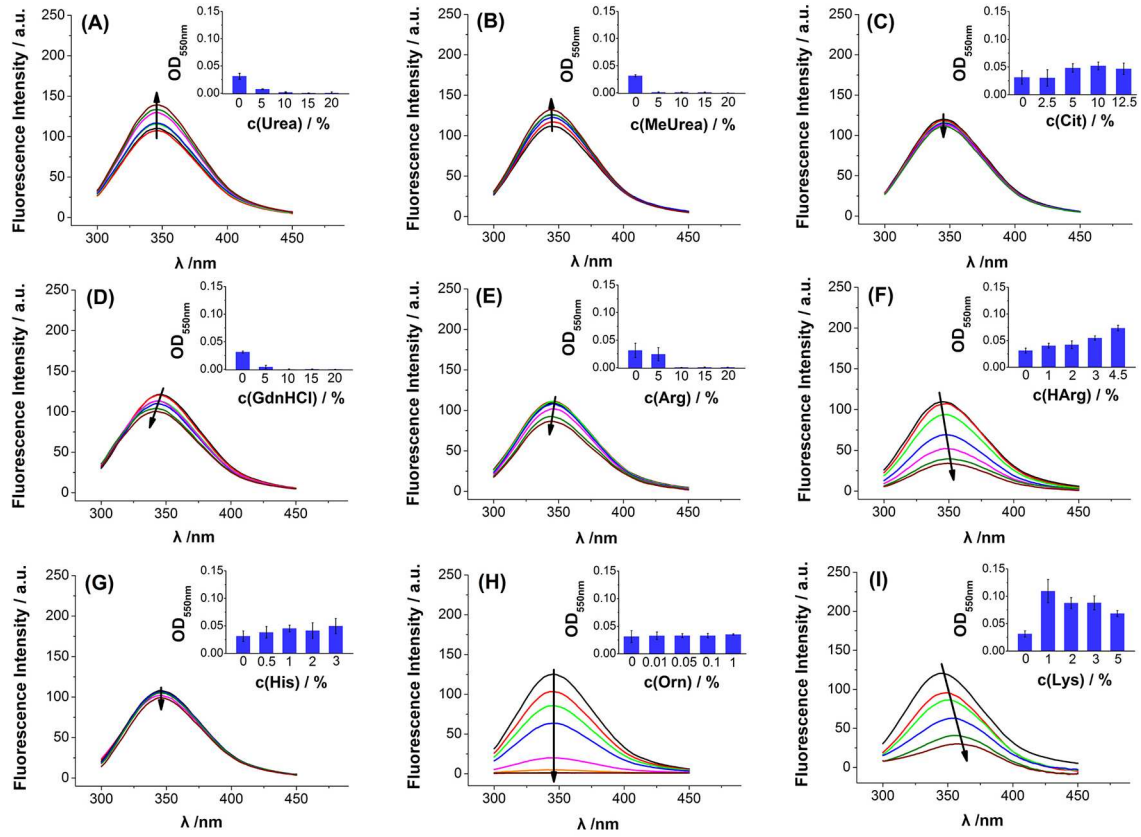

Figure S1 Effects of additives on fluorescence spectrum and turbidity measurement (OD<sub>550nm</sub>) of Papain solution. A, B, C, D, E, F, G, H and I represent Urea, MeUrea, Cit, GdnHCl, Arg, HArg, His, Orn and Lys, respectively.

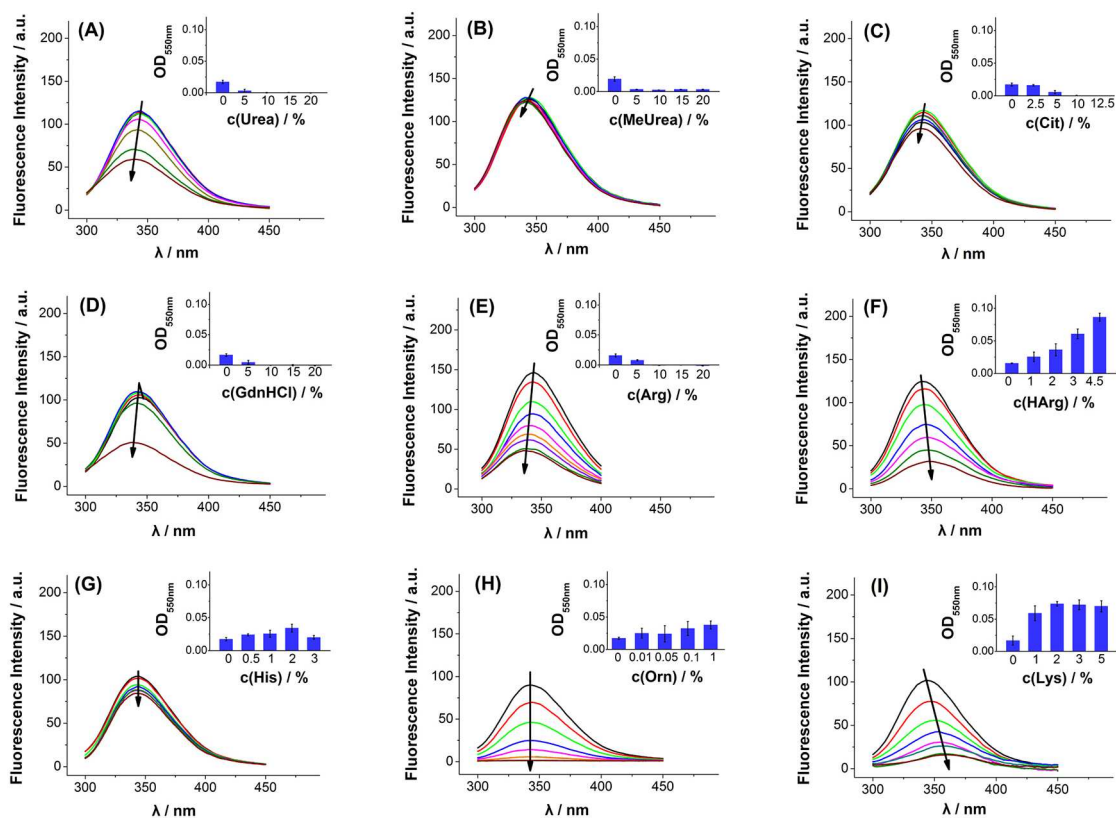

Figure S2 Effects of additives on fluorescence spectrum and turbidity measurement ( $OD_{550nm}$ ) of BSA solution. A, B, C, D, E, F, G, H and I represent Urea, MeUrea, Cit, GdnHCl, Arg, HArg, His, Orn and Lys, respectively.

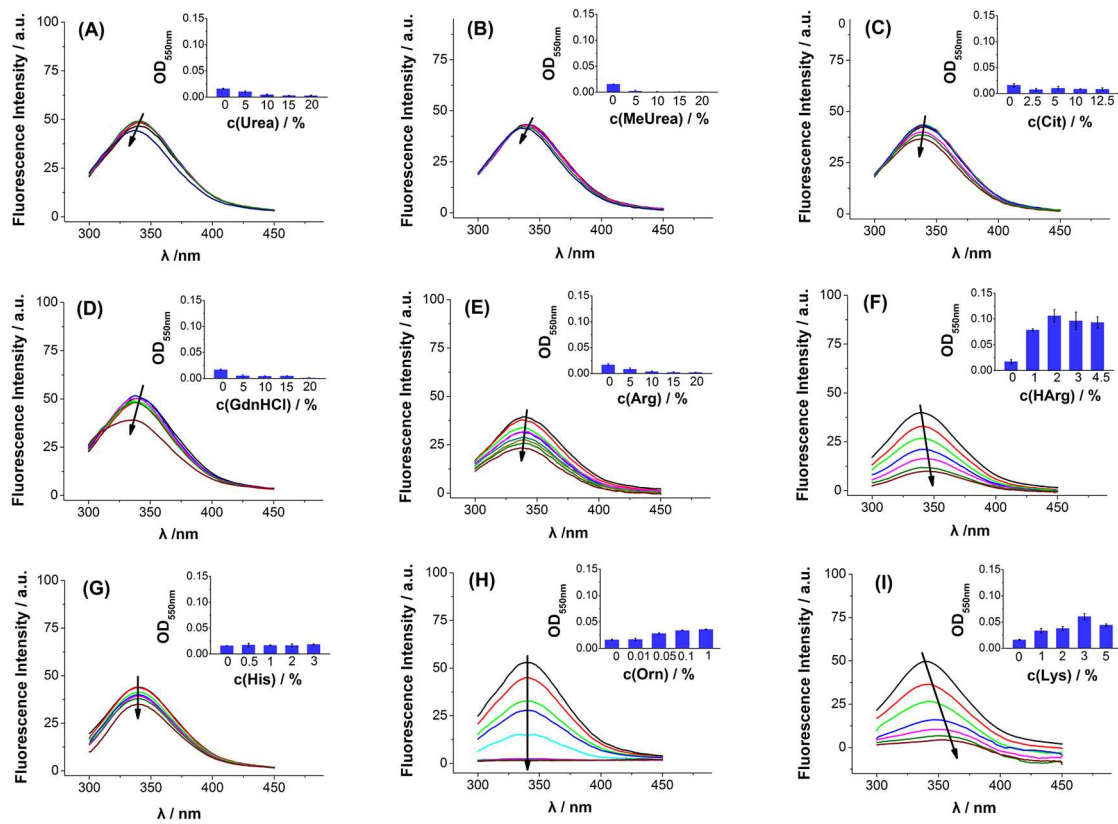

Figure S3 Effects of additives on fluorescence spectrum and turbidity measurement (OD<sub>550nm</sub>) of HSA solution. A, B, C, D, E, F, G, H and I represent Urea, MeUrea, Cit, GdnHCl, Arg, HArg, His, Orn and Lys, respectively.

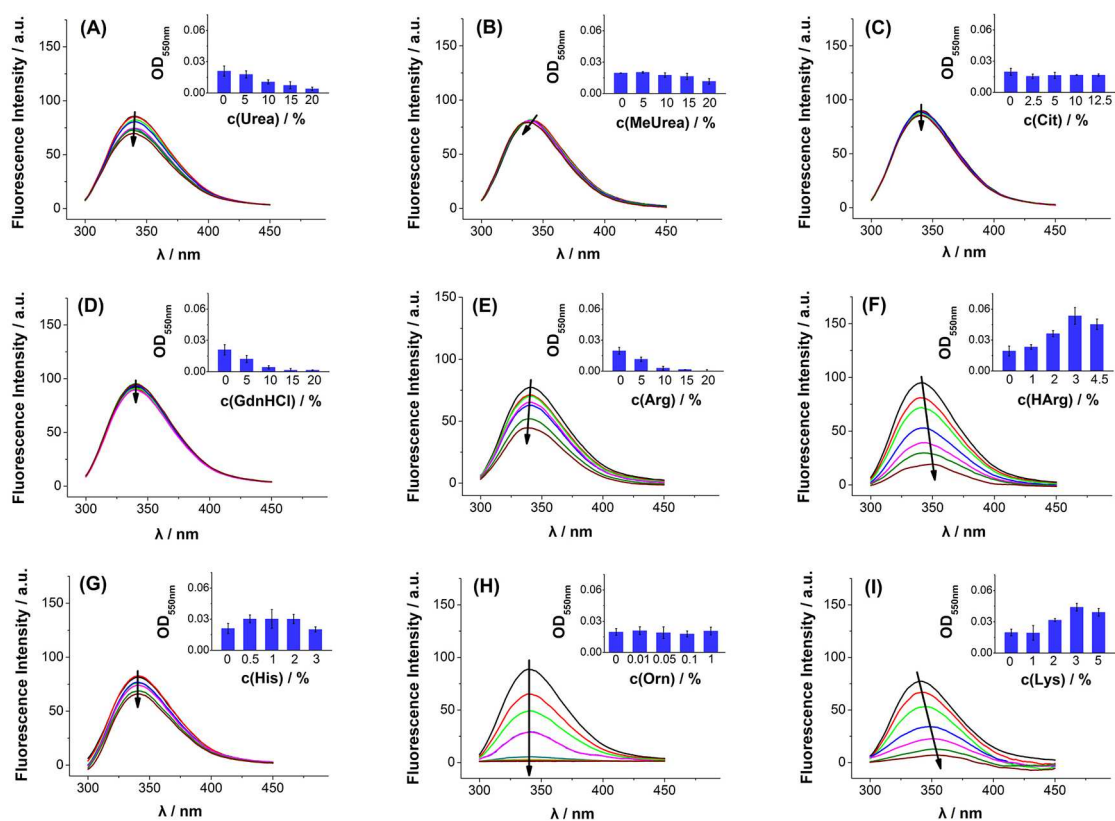

Figure S4 Effects of additives on fluorescence spectrum and turbidity measurement ( $OD_{550nm}$ ) of Lyso solution. A, B, C, D, E, F, G, H and I represent Urea, MeUrea, Cit, GdnHCl, Arg, HArg, His, Orn and Lys, respectively.

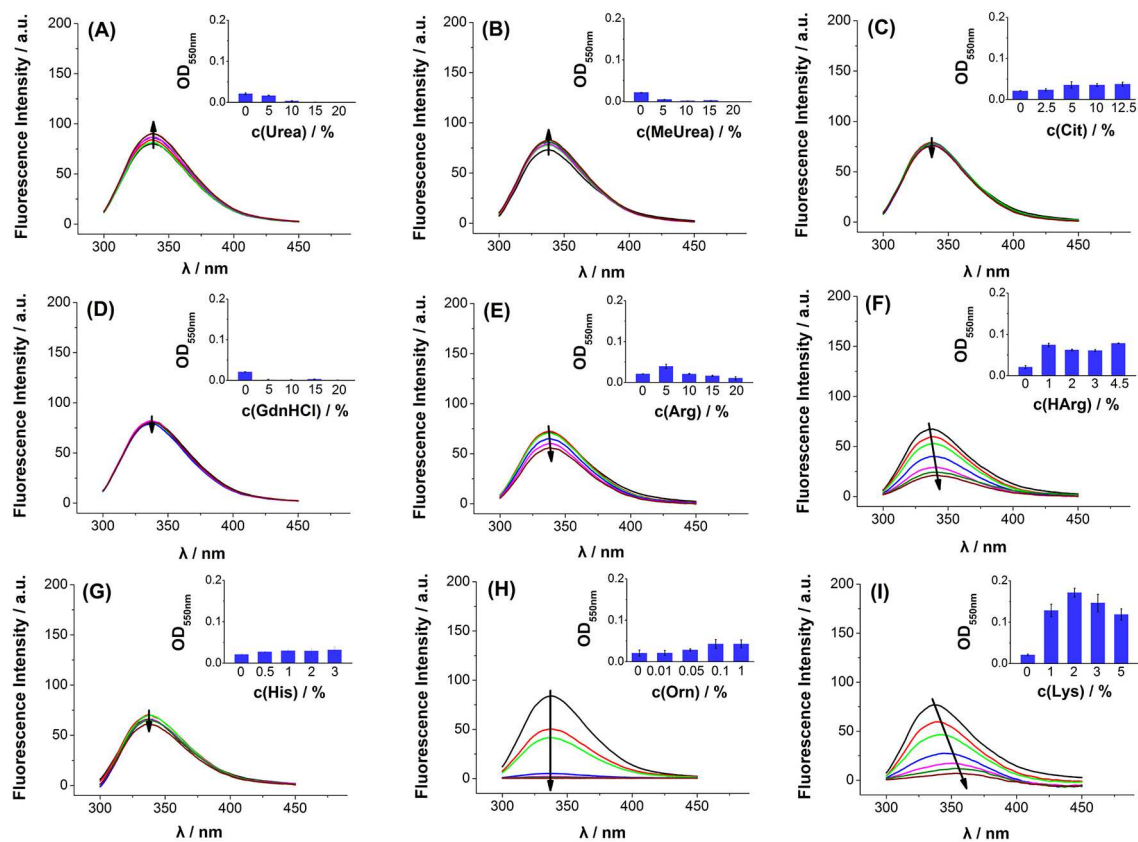

Figure S5 Effects of additives on fluorescence spectrum and turbidity measurement ( $OD_{550nm}$ ) of Ela solution. A, B, C, D, E, F, G, H and I represent Urea, MeUrea, Cit, GdnHCl, Arg, HArg, His, Orn and Lys, respectively.

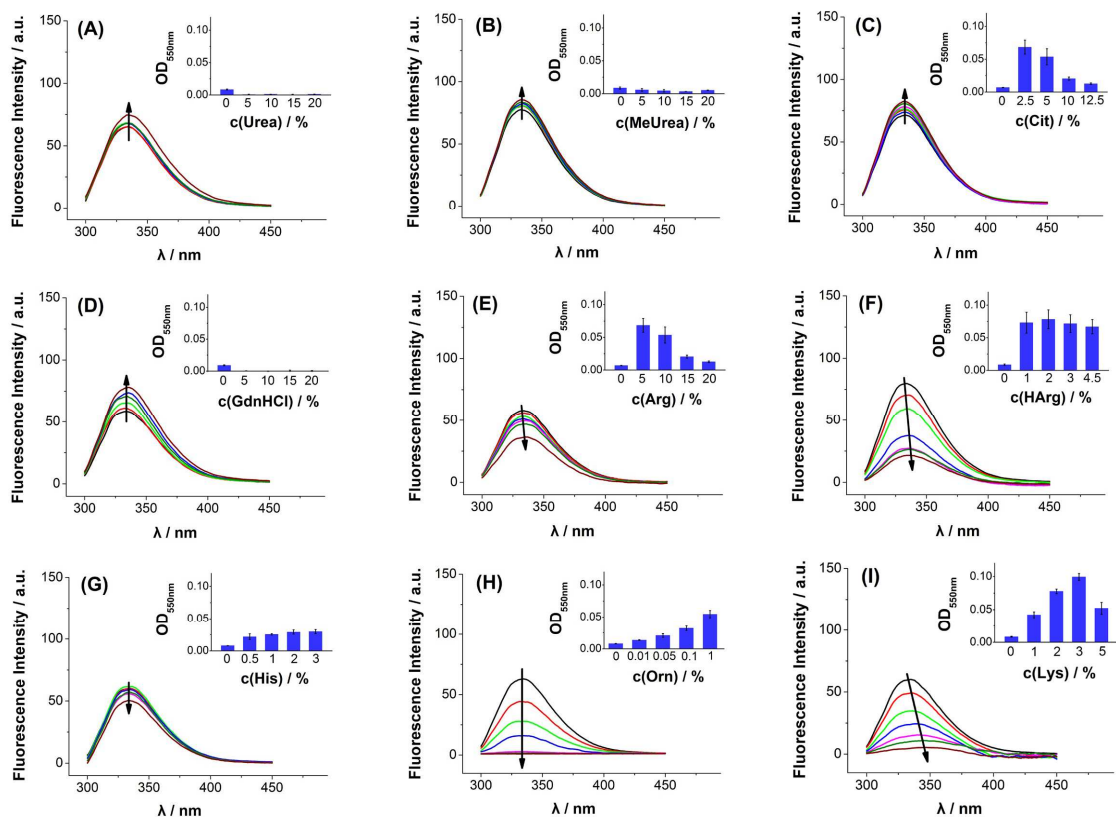

Figure S6 Effects of additives on fluorescence spectrum and turbidity measurement ( $OD_{550nm}$ ) of  $\beta$ -Lg solution. A, B, C, D, E, F, G, H and I represent Urea, MeUrea, Cit, GdnHCl, Arg, HArg, His, Orn and Lys, respectively.

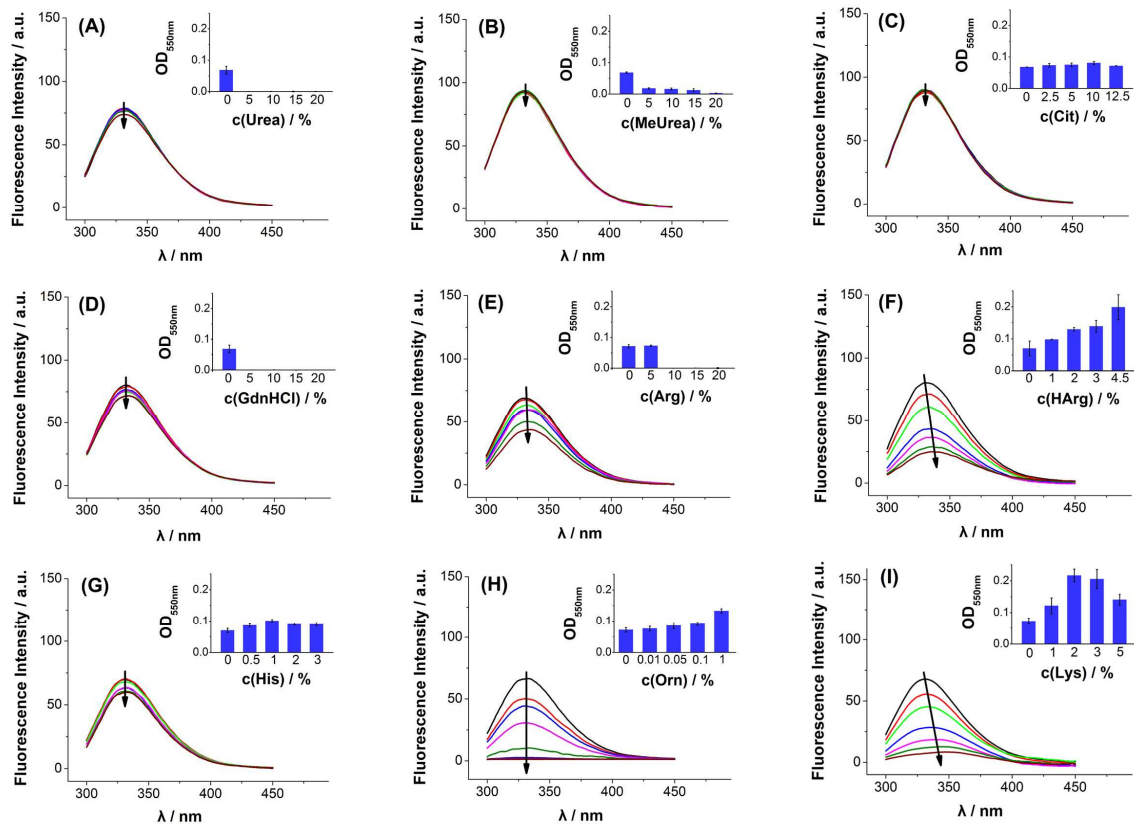

Figure S7 Effects of additives on fluorescence spectrum and turbidity measurement (OD<sub>550nm</sub>) of ProK solution. A, B, C, D, E, F, G, H and I represent Urea, MeUrea, Cit, GdnHCl, Arg, HArg, His, Orn and Lys, respectively.

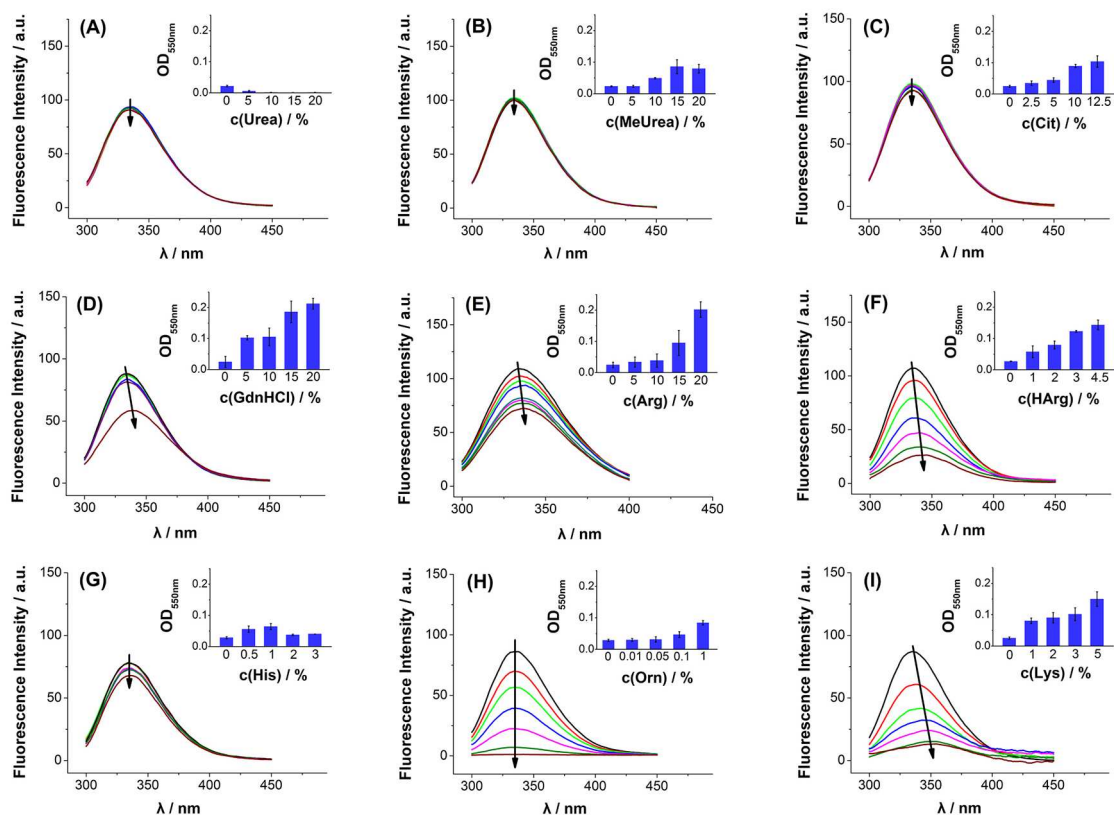

Figure S8 Effects of additives on fluorescence spectrum and turbidity measurement ( $OD_{550nm}$ ) of OVA solution. A, B, C, D, E, F, G, H and I represent Urea, MeUrea, Cit, GdnHCl, Arg, HArg, His, Orn and Lys, respectively.
